# Supplementary material for: Genetic Diversity and Distribution of Blastocystis Subtype 3 in Human Populations, with Special Reference to a Rural Population in Central Mexico
Source: Biomed Res Int. 2018 Mar 18;2018:3916263. doi: 10.1155/2018/3916263 (PMC5878905; doi:10.1155/2018/3916263)
Supplement: Supplementary Materials — List of the sequences reported in the present study and those previously reported within the literature. [file 3916263.f1.xlsx]

## Sheet: Supplementary Material
Access Number	Country	Haplotype
MF539962	Mexico, Morelos	1
MF539963	Mexico, Morelos	1
MF539964	Mexico, Morelos	1
MF539965	Mexico, Morelos	1
MF539966	Mexico, Morelos	1
MF539967	Mexico, Morelos	1
MF539968	Mexico, Morelos	1
MF539969	Mexico, Morelos	1
MF539970	Mexico, Morelos	1
MF539971	Mexico, Morelos	1
MF539972	Mexico, Morelos	1
MF539973	Mexico, Morelos	1
MF539974	Mexico, Morelos	1
MF539975	Mexico, Morelos	1
MF539976	Mexico, Morelos	1
MF539977	Mexico, Morelos	1
MF539978	Mexico, Morelos	1
MF539979	Mexico, Morelos	1
MF539980	Mexico, Morelos	1
MF539981	Mexico, Morelos	1
MF539982	Mexico, Morelos	1
MF539983	Mexico, Morelos	1
MF539984	Mexico, Morelos	1
MF539985	Mexico, Morelos	1
MF539986	Mexico, Morelos	1
MF539987	Mexico, Morelos	1
MF539988	Mexico, Morelos	1
MF539989	Mexico, Morelos	1
MF539990	Mexico, Morelos	1
MF539991	Mexico, Morelos	2
MF539992	Mexico, Morelos	1
MF539993	Mexico, Morelos	1
MF539994	Mexico, Morelos	1
MF539995	Mexico, Morelos	3
MF539996	Mexico, Morelos	1
MF539997	Mexico, Morelos	1
MF539998	Mexico, Morelos	3
MF539999	Mexico, Morelos	1
MF540000	Mexico, Morelos	1
MF540001	Mexico, Morelos	1
MF540002	Mexico, Morelos	3
MF540003	Mexico, Morelos	1
MF540004	Mexico, Morelos	1
MF540005	Mexico, Morelos	1
MF540006	Mexico, Morelos	1
MF540007	Mexico, Morelos	1
MF540008	Mexico, Morelos	1
MF540009	Mexico, Morelos	1
MF540010	Mexico, Morelos	1
MF540011	Mexico, Morelos	1
MF540012	Mexico, Morelos	1
MF540013	Mexico, Morelos	1
MF540014	Mexico, Morelos	1
MF540015	Mexico, Morelos	1
KP055753.1	Mexico, Mexico City	1
KP055751.1	Mexico, Mexico City	1
KP055748.1	Mexico, Mexico City	1
KP055746.1	Mexico, Mexico City	4
KP055742.1	Mexico, Mexico City	1
KP055741.1	Mexico, Mexico City	1
KP055739.1	Mexico, Mexico City	1
KP055737.1	Mexico, Mexico City	3
KP055735.1	Mexico, Mexico City	1
KP055727.1	Mexico, Mexico City	1
KP055726.1	Mexico, Mexico City	1
KP055724.1	Mexico, Mexico City	1
KP055716.1	Mexico, Mexico City	1
KP055714.1	Mexico, Mexico City	1
KP055711.1	Mexico, Mexico City	1
KP055709.1	Mexico, Mexico City	3
KP055705.1	Mexico, Mexico City	1
KP055704.1	Mexico, Mexico City	1
KP055701.1	Mexico, Mexico City	5
KP055700.1	Mexico, Mexico City	6
KP055699.1	Mexico, Mexico City	1
KP055698.1	Mexico, Mexico City	7
KP055697.1	Mexico, Mexico City	1
KP055693.1	Mexico, Mexico City	1
KP055691.1	Mexico, Mexico City	1
KP055690.1	Mexico, Mexico City	8
KP055686.1	Mexico, Mexico City	3
KP055682.1	Mexico, Mexico City	1
KP055681.1	Mexico, Mexico City	1
KP055680.1	Mexico, Mexico City	1
KP055679.1	Mexico, Mexico City	1
KP055677.1	Mexico, Mexico City	1
KP055676.1	Mexico, Mexico City	9
KP055675.1	Mexico, Mexico City	1
KP055673.1	Mexico, Mexico City	1
KP055671.1	Mexico, Mexico City	1
KP055668.1	Mexico, Mexico City	1
KP055667.1	Mexico, Mexico City	1
KP055666.1	Mexico, Mexico City	3
KP055665.1	Mexico, Mexico City	1
KP055662.1	Mexico, Mexico City	1
KM438213.1	Nepal, Qatar	1
JN587549.1	Sweden	10
JN587548.1	Sweden	1
JN587547.1	Sweden	2
JN587546.1	Sweden	11
LT222067.1	Iraq	12
LT222066.1	Iraq	12
KP284172.1	Italy	3
KP284171.1	Italy	1
FJ666896.1	France	1
FJ666895.1	France	2
FJ666894.1	France	1
FJ666893.1	France	1
FJ666892.1	France	1
FJ666890.1	France	3
FJ666889.1	France	1
FJ666888.1	France	1
FJ666883.1	France	1
FJ666881.1	France	1
FJ666878.1	France	13
FJ666872.1	France	2
FJ666871.1	France	2
FJ666870.1	France	2
FJ666867.1	France	1
FJ666866.1	France	2
FJ666864.1	France	1
FJ666862.1	France	14
FJ666859.1	France	1
FJ666853.1	France	2
FJ666850.1	France	1
FJ666849.1	France	15
FJ666848.1	France	1
FJ666841.1	France	1
FJ666891.1	France	3
FJ666882.1	France	1
FJ666877.1	France	1
FJ666873.1	France	16
FJ666851.1	France	1
FJ666842.1	France	1
JN942529.1	France	1
FJ666887.1	France	17
FJ666857.1	France	17
FJ666854.1	France	17
FJ666847.1	France	17
FJ666844.1	France	17
FJ666897.1	France	3
KU928117.1	SurAmerica	1
KU928116.1	SurAmerica	2
KU928115.1	SurAmerica	3
KU928114.1	SurAmerica	18
KU928112.1	SurAmerica	18
KU928111.1	SurAmerica	1
KU928110.1	SurAmerica	2
KU928109.1	SurAmerica	19
KU928108.1	SurAmerica	2
KU928107.1	SurAmerica	1
KU928106.1	SurAmerica	1
KU928105.1	SurAmerica	2
KU928104.1	SurAmerica	10
KU928103.1	SurAmerica	20
KU928102.1	SurAmerica	1
KU928101.1	SurAmerica	12
KU928100.1	SurAmerica	11
KU928099.1	SurAmerica	10
KU928098.1	SurAmerica	10
KU928097.1	SurAmerica	10
KU928096.1	SurAmerica	10
KU928095.1	SurAmerica	10
KU928094.1	SurAmerica	1
KU928093.1	SurAmerica	10
KU928092.1	SurAmerica	3
KU928091.1	SurAmerica	2
KM374618.1	SurAmerica	3
KM374617.1	SurAmerica	1
